# Supplementary material for: Pharmacokinetic and Environmental Risk Assessment of Prime-2-CoV, a Non-Replicating Orf Virus-Based Vaccine against SARS-CoV-2
Source: MDPI journal article supplement (doi:10.3390/vaccines12050492), 2024-05-02
Supplement: s1 [file s1]

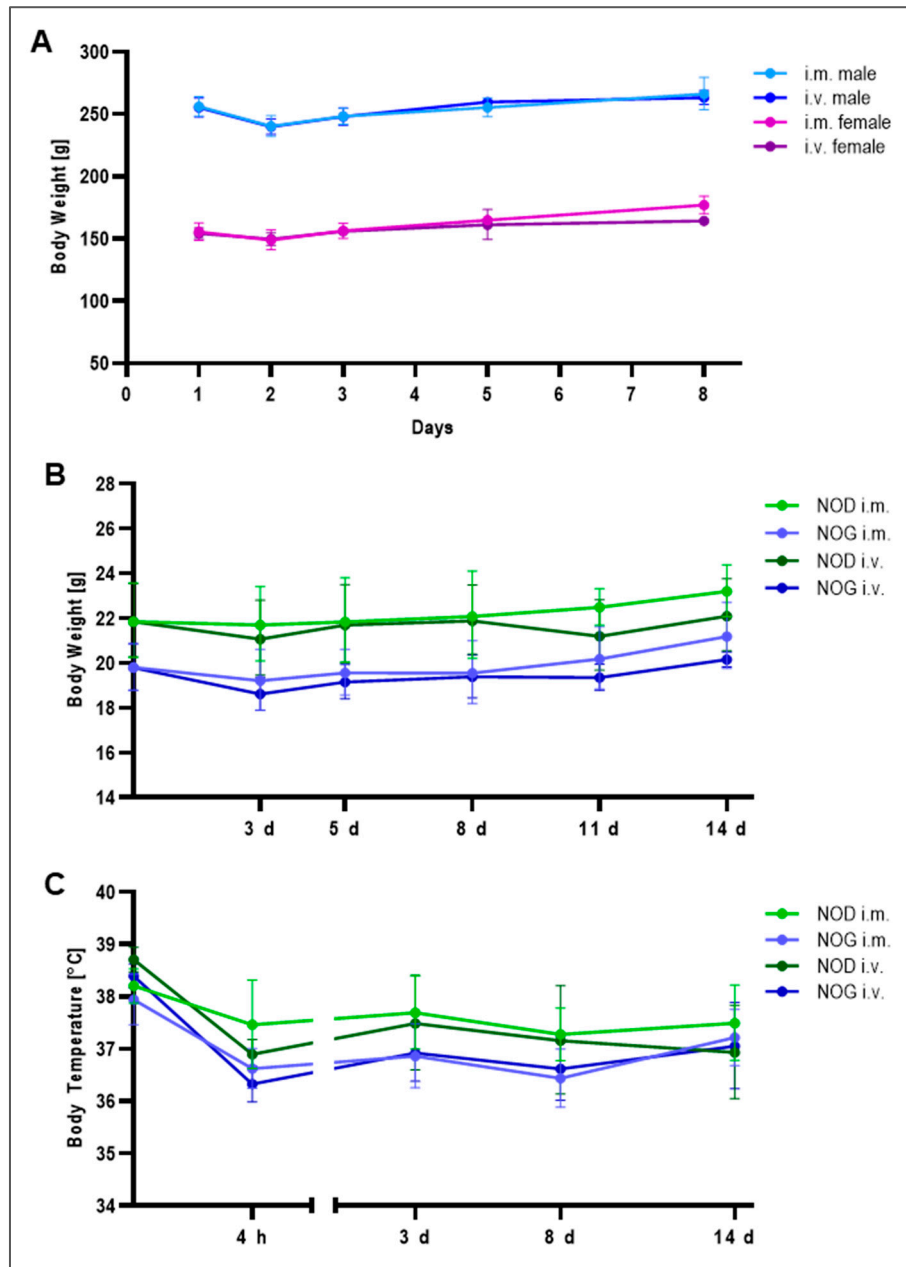

**Supplement Figure S1:** Development of Body Weight in Rats (A) and NOD and NOG Mice (B) as well as Body Temperature in Mice (C) after Vaccination with Prime-2-CoV.
